# Supplementary material for: Vertically aligned nanocomposite La0.8Sr0.2CoO3/(La0.5Sr0.5)2CoO4 cathodes – electronic structure, surface chemistry and oxygen reduction kinetics
Source: Royal Society of Chemistry journal article supplement (doi:10.1039/c4ta04993d), 2014-10-24
Supplement: c4ta04993d1.pdf [file c4ta04993d1.pdf]

**Supporting Information for:**

**Vertically Aligned Nanocomposite  $\text{La}_{0.8}\text{Sr}_{0.2}\text{CoO}_3/(\text{La}_{0.5}\text{Sr}_{0.5})_2\text{CoO}_4$  Cathodes -  
Electronic Structure, Surface Chemistry and Oxygen Reduction Kinetics**

*Wen Ma,<sup>1</sup> Jae Jin Kim,<sup>2</sup> Nikolai Tsvetkov,<sup>1</sup> Takeshi Daio,<sup>3</sup> Yener Kuru,<sup>1, 2</sup> Zhuhua Cai,<sup>1</sup> Yan  
Chen<sup>1</sup>, Kazunari Sasaki,<sup>3</sup> Harry L. Tuller<sup>2</sup> and Bilge Yildiz<sup>1\*</sup>*

<sup>1</sup>Laboratory for Electrochemical Interfaces, Department of Nuclear Science and Engineering,  
Massachusetts Institute of Technology, 77 Massachusetts Avenue, Cambridge, MA 02139, USA

<sup>2</sup>Department of Materials Science and Engineering, Massachusetts Institute of Technology, 77  
Massachusetts Avenue, Cambridge, MA 02139, USA

<sup>3</sup>Department of Mechanical Engineering, Kyushu University, Fukuoka-shi, 819-0395 Fukuoka,  
Japan

Corresponding Author: \*E-mail: [byildiz@mit.edu](mailto:byildiz@mit.edu)

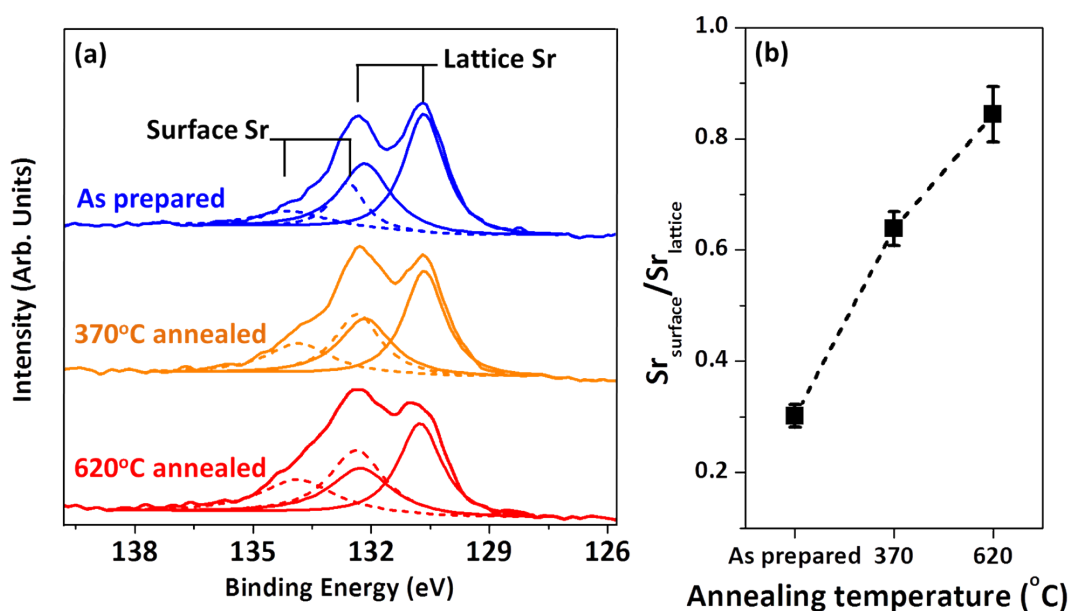

**Figure S1.** (a) Sr 3d photoelectron spectra, showing the evolution of the lattice and surface binding environment for Sr, and (b) the  $\text{Sr}_{\text{surface}}/\text{Sr}_{\text{lattice}}$  ratio on  $\text{LSC}_{113/214}$  VAN structure, at the as-prepared state and after annealing the specimen at 370°C and at 620°C in air for one hour.

Segregation and precipitation of Sr-rich phases at the surface of the  $\text{LSC}_{113/214}$  VAN films upon annealing was further confirmed by the evolution of Sr 3d photoelectron spectrum (Fig S1). The Sr 3d peak was fitted by two sets of doublet peaks:  $\text{Sr}_{\text{lattice}}$  and  $\text{Sr}_{\text{surface}}$ . The  $3d_{3/2}$  and  $3d_{5/2}$  doublet separation and area ratio were constrained to their theoretical values of 1.5 eV and 1:1.5, respectively. The  $\text{Sr}_{\text{lattice}}$  doublet could be assigned to the lattice-bound Sr within the perovskite and Ruddlesden-Popper structures, while  $\text{Sr}_{\text{surface}}$  could be attributed to the formation of species on the surface such as  $\text{SrO}$ ,  $\text{Sr}(\text{OH})_2$  and  $\text{SrCO}_3$ .<sup>1-3</sup> With increasing annealing temperature,  $\text{Sr}_{\text{surface}}$  peaks become more distinct, and  $\text{Sr}_{\text{lattice}}/\text{Sr}_{\text{surface}}$  ratio increases drastically from 0.30 to 0.85 after annealing at 620°C. This result is consistent with the AFM and AR-XPS results shown in the manuscript.

| Phase                                              | LSC <sub>113</sub> | LSC <sub>214</sub> |
|----------------------------------------------------|--------------------|--------------------|
| <b>LSC<sub>113/214</sub> VAN (surface)</b>         | 0.40±0.02          | 0.53±0.02          |
| <b>Single phase film (surface)</b>                 | 0.38±0.03          | 0.56±0.03          |
| <b>LSC<sub>113/214</sub> VAN (bulk)</b>            | 0.28±0.07          | 0.43±0.07          |
| <b>Single phase film (bulk)</b>                    | 0.21±0.02          | 0.53±0.03          |
| <b>LSC<sub>113/214</sub> VAN PLD target (bulk)</b> | 0.32±0.03          | 0.55±0.05          |

**Table S1.** Sr/(Sr+La) ratio deduced from Auger electron spectroscopy on the LSC<sub>113</sub> and LSC<sub>214</sub> grains of the VAN film, on the LSC<sub>113</sub> and LSC<sub>214</sub> single phase films, and on the LSC<sub>113/214</sub> VAN PLD target.

“Surface” represents the condition of the as-prepared sample surface; “Bulk” represents the measurements taken after sputtering off the surface layer and exposing the bulk. The sputtering was performed by low energy Ar<sup>+</sup> beam with 0.5 mA beam current, 1 kV beam voltage, and 1 min duration. The value after ‘±’ is the standard deviation within the taken set of measurements and does not include the quantification of errors arising from the system or analysis. LSC<sub>113</sub> and LSC<sub>214</sub> phases were well separated in the PLD target after sintered at 1300 °C for 10 hours in air, as well as in the VAN films.

The Sr concentration in all the as-prepared films (LSC<sub>113/214</sub> VAN, LSC<sub>113</sub> and LSC<sub>214</sub>) is compared to each other to assess whether compositional changes could contribute to the differences observed in the cathode area specific resistance (ASR). First, all samples have an Sr/(La+Sr) ratio at the as-prepared surface that is greater than the targeted 20% and 50% due to Sr segregation. After sputtering off the surface, the Sr/(Sr+La) in the subsurface (or bulk) is close to ~0.2 for LSC<sub>113</sub> and ~0.5 for LSC<sub>214</sub>. A small deviation of the Sr/(Sr+La) in the VAN films with respect to the single phase films is also observed, i.e. ~0.28 for LSC<sub>113</sub> and ~0.43 for LSC<sub>214</sub>. This is likely due to the way the VAN films are prepared – by laser ablation of a composite target during PLD which itself was sintered at elevated temperatures. However, the 10-fold decrease found in the VAN cathode ASR (Figure 9 in the manuscript) compared to single phase LSC<sub>113</sub> and LSC<sub>214</sub> is not likely to arise from the changes in the Sr composition in the bulk. For LSC<sub>113</sub>, changing Sr/(Sr+La) from 21% to 28% is expected to lead to only 2-3 times enhancement in the surface exchange kinetics.<sup>4</sup> For LSC<sub>214</sub>, we have shown in our ongoing work that changing Sr/(Sr+La) substantially from 50% to 25% increases the surface exchange kinetics

by 10 times.<sup>5</sup> Therefore, a change from 53% to 43% is not expected to give rise to nearly 10 times reduction of ASR on LSC<sub>214</sub> domains of the VAN film. Furthermore, by comparing the first two rows of Table S1, we can see that, at the surface (the critical place where the oxygen reduction reactions take place), the Sr compositions on each phase in VAN and on the respective single phase films are very close to each other.

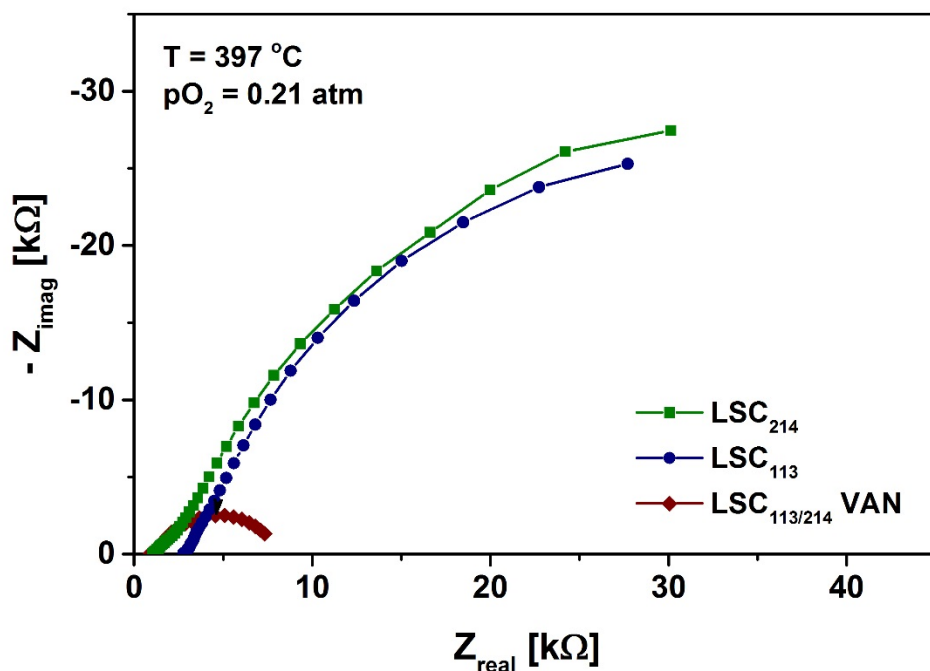

**Figure S2.** Typical electrochemical impedance spectra measured for an LSC<sub>214</sub>, LSC<sub>113</sub> and LSC<sub>113/214</sub> VAN phase thin film electrode on GDC/YSZ(001) at 397 °C and in air. All the impedance spectra show similar characteristics except that x-axis offset resistances may vary from sample to sample. This might come from the variation in homogeneity and/or thickness of YSZ single substrates.

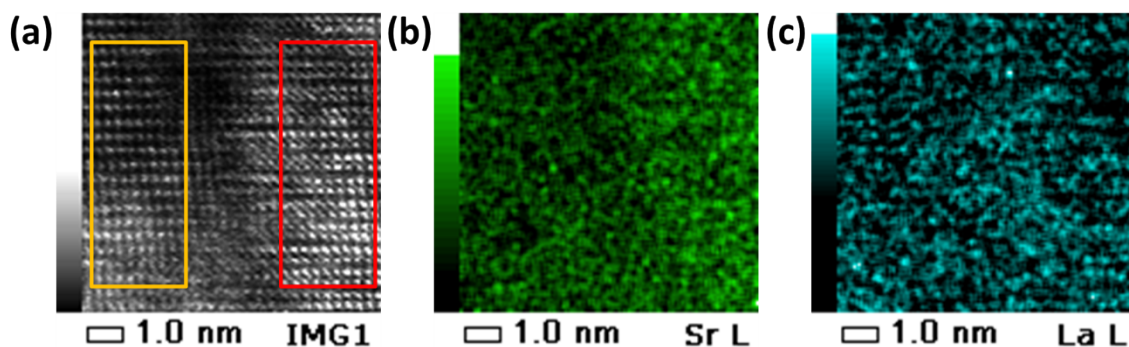

**Figure S3.** a) STEM-HAADF image at LSC<sub>113</sub> and LSC<sub>214</sub> interface. STEM-EDX mapping of b) Sr L and c) La L in the same region as a). From the quantitative EDX analysis in yellow (left) and red (right) rectangular region, we could identify that the yellow (left) region is LSC<sub>113</sub> phase and the red (right) region is LSC<sub>214</sub> phase. The quantities are shown in Table S2.

| Yellow (left) region in Figure S3(a) LSC <sub>113</sub> |                |                   |                   |
|---------------------------------------------------------|----------------|-------------------|-------------------|
| Component                                               | Position (keV) | Weight percentage | Atomic percentage |
| O K                                                     | 0.525          | 3.33              | 16.93             |
| Co K                                                    | 6.924          | 26.22             | 36.17             |
| Sr L                                                    | 16.52          | 15.33             | 15.33             |
| La L                                                    | 4.65           | 53.93             | 31.57             |
| total                                                   |                | 100               | 100               |
| Sr/(Sr+La)=0.32                                         |                |                   |                   |
| Red (right) region in Figure S3(a) LSC <sub>214</sub>   |                |                   |                   |
| Component                                               | Position (keV) | Weight percentage | Atomic percentage |
| O K                                                     | 0.525          | 7.55              | 32.99             |
| Co K                                                    | 6.924          | 19.11             | 22.67             |
| Sr L                                                    | 16.52          | 25.26             | 20.15             |
| La L                                                    | 4.65           | 48.08             | 24.19             |
| total                                                   |                | 100               | 100               |
| Sr/(Sr+La)=0.45                                         |                |                   |                   |

**Table S2.** Quantitative EDX analysis of the highlighted region in Figure S3(a) for O K, Co K, Sr L, La L and Sr/(Sr+La) ratio.

## References

1. Z. H. Cai, M. Kubicek, J. Fleig and B. Yildiz, *Chemistry of Materials*, 2012, **24**, 1116-1127.
2. P. A. W. van der Heide, *Surface and Interface Analysis*, 2002, **33**, 414-425.
3. J. C. Dupin, D. Gonbeau, P. Vinatier and A. Levasseur, *Phys. Chem. Chem. Phys.*, 2000, **2**, 1319-1324.
4. S. B. Adler, *Solid State Ionics*, 1998, **111**, 125-134.
5. Y. Chen, H. Téllez , M. Burriel, F. Yang, N. Tsvetkov, D. W. McComb, J. Kilner and B. Yildiz, *in preparation*, 2014.
